# Supplementary material
Source: Springer Nature journal article supplement (https://www.springermedizin.de/resource/supplementary/12950_2010_169_MOESM1_ESM.pdf/9558120)

# A: Acute Asthma: Animal Model

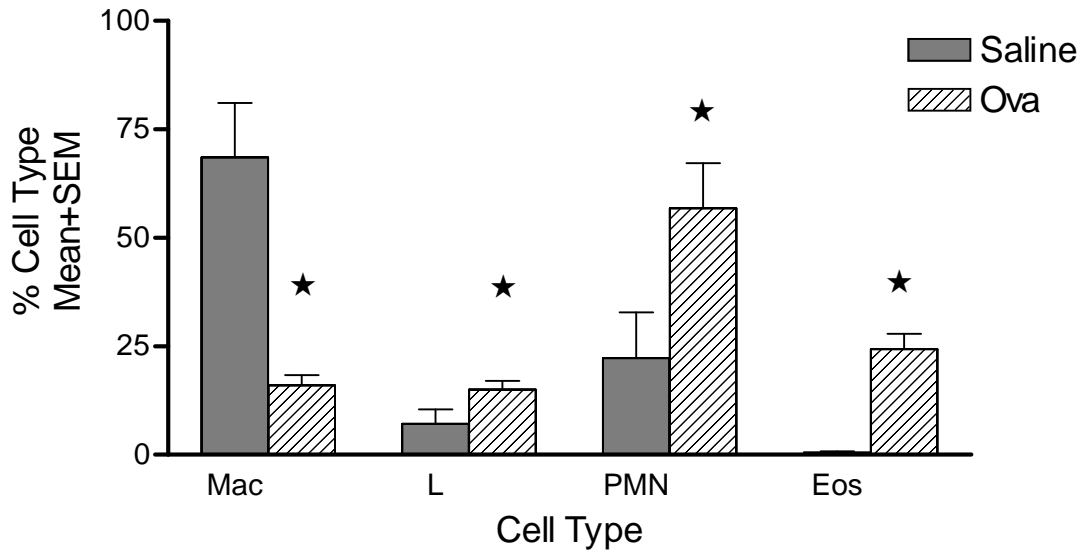

★ P ≤ 0.05

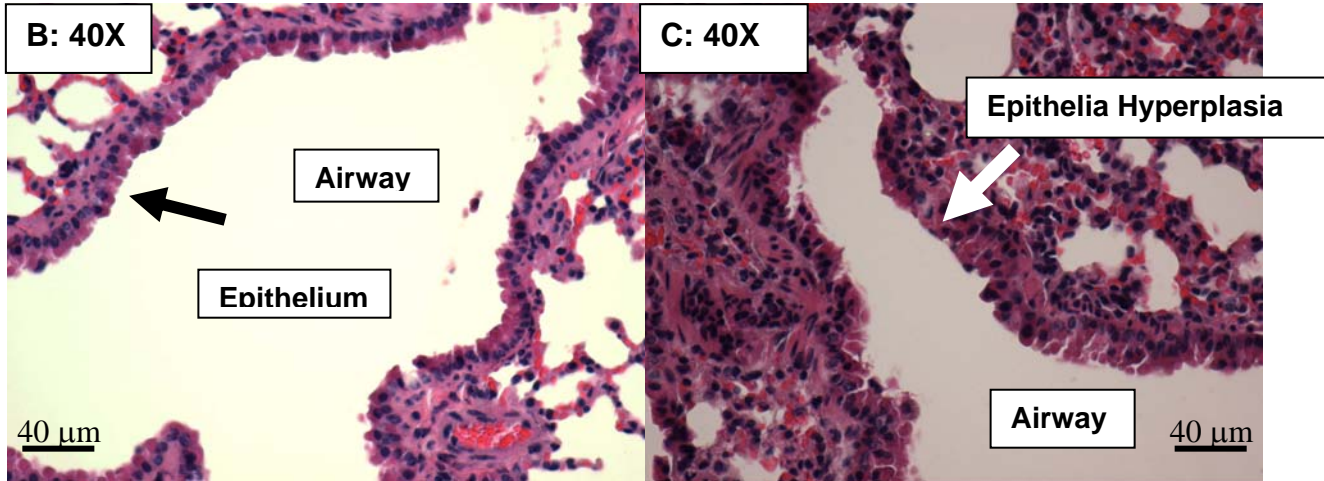

Supplement: MOESM1 [file 9558120]
